# Supplementary material for: CENP-F couples cargo to growing and shortening microtubule ends
Source: PubMed Central journal article supplement — Mol Biol Cell. 2017 Sep 1;28(18):2400–9. doi: 10.1091/mbc.E16-11-0756 (PMC5576903; doi:10.1091/mbc.e16-11-0756), 2017-09-01
Supplement: supp_E16-11-0756v1_CombinedSupMats.pdf [file supp_E16-11-0756v1_CombinedSupMats.pdf]

# Supplemental Materials

*Molecular Biology of the Cell*

Kanfer et al.

Supplementary Figure 1

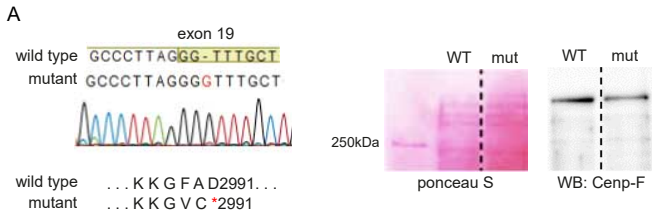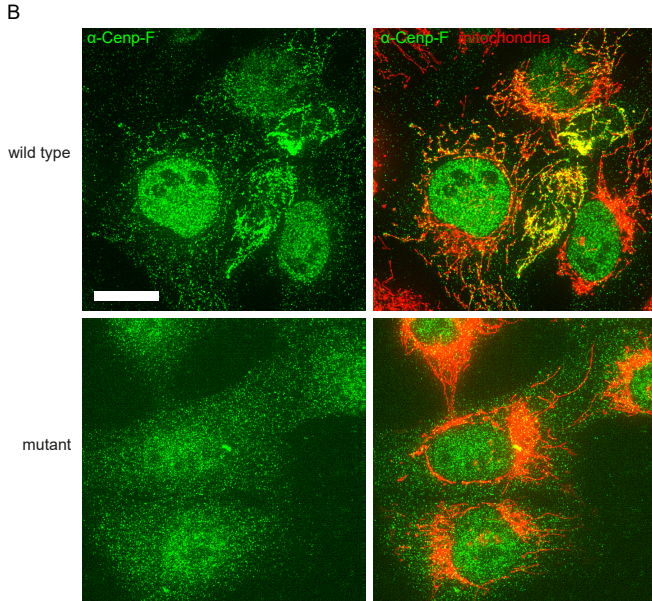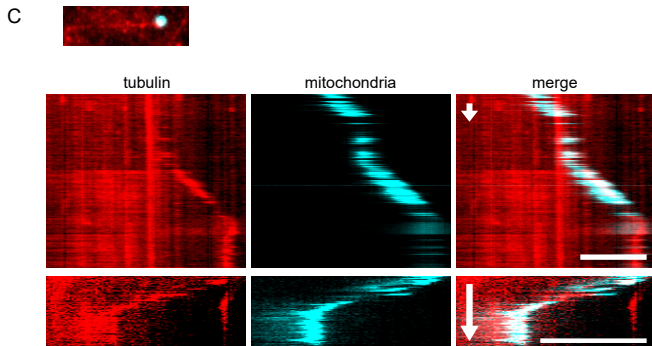

**Supplemental Figure 1. CENP-F-independent mitochondrial movements *in vitro*. (A)**

Characterization of the CRISPR/Cas9-induced genetic lesion in CENP-F mutant cells. Left, electropherogram of a sequencing reaction from the mutant cell line showing the frame shift mutation and its consequence at protein level. Right, Western blot of protein extract from wild-type and CENP-F mutant cell lines showing a slight decrease in protein abundance. (B) Immunofluorescence of CENP-F (green) relative to mitochondria (red) in wild-type (top) and CENP-F mutant Kermit U2OS cells (Kanferet *et al.* 2015). Scale bar, 20  $\mu\text{m}$  (C) as in Figure 2, except that mitochondria were isolated from CENP-F mutant Kermit U2OS cells) and that recombinant CENP-F was omitted. Top, kymogram of a mitochondrion following a polymerizing microtubule. Bottom, kymogram of a mitochondrion following a de-polymerizing microtubule. Arrow, 120 s; Scale bar, 5  $\mu\text{m}$ .
